# Supplementary material
Source: PubMed Central journal article supplement (PMC9241621)
Supplement: spectrum.01054-22-s0001.pdf [file spectrum.01054-22-s0001.pdf]

1 **Supplemental Material**

2

3 **Supplemental Tables**

4 **Table S1.** Algorithms for determining SARS-CoV-2 IgG results for the three serological  
 5 assays utilized in this study.

| Assay and calculation                                                                                              | Cutoff value                                                                                                 | Result                                                                                                                                                                                                                |
|--------------------------------------------------------------------------------------------------------------------|--------------------------------------------------------------------------------------------------------------|-----------------------------------------------------------------------------------------------------------------------------------------------------------------------------------------------------------------------|
| Tetracore FlexImmArray<br>SARS-CoV-2 IgG multiplex<br>bead assay:<br>(Test sample MFI)/(Average<br>Calibrator MFI) | ≥1.2                                                                                                         | SARS-CoV-2 Human IgG<br>Positive                                                                                                                                                                                      |
|                                                                                                                    | ≤0.9                                                                                                         | SARS-CoV-2 Human IgG<br>Negative                                                                                                                                                                                      |
|                                                                                                                    | >0.9 and <1.2                                                                                                | SARS-CoV-2 Human IgG<br>Equivocal result. Perform a<br>re-test using the same<br>sample in duplicate wells. If<br>the result is the same as<br>before perform a re-test using<br>sample collected after 7-10<br>days. |
|                                                                                                                    | If one or two of three<br>targets show a ratio<br>of >1.2 and one or<br>two show a ratio of<br>≥0.9 and <1.2 | SARS-CoV-2 Human IgG<br>Equivocal result. Perform a<br>re-test using the same<br>sample in duplicate wells. If                                                                                                        |

|                                                     |            |                                                     |
|-----------------------------------------------------|------------|-----------------------------------------------------|
|                                                     |            | the result is same as before<br>sample is negative. |
| Abbott SARS-CoV-2 IgG<br>assay: Index (S/C)         | $\geq 1.4$ | Positive                                            |
|                                                     | $< 1.4$    | Negative                                            |
| Ortho VITROS Anti-SARS-<br>CoV-2 Total assay: (S/C) | $\geq 1.0$ | Reactive                                            |
|                                                     | $< 1.0$    | Non-reactive                                        |

6

7

8 **Table S2.** Characteristics of specimens with discrepant results between SARS-CoV-2 serological assays

| Type of Discrepancy                                         | Study sample number | COVID-19 previous infection status (determined by positive qRT-PCR) | Abbott qualitative result (cutoff 1.4) | Abbott quantitative result (index S/C) | Ortho qualitative result (cutoff 1.0) | Ortho quantitative result (S/C) | Tetracore overall qualitative result (based on three antigens) | Tetracore antigen qualitative results (cutoff 1.2) |           |               | Tetracore antigen quantitative results (ratio to calibrator) |      |               | Commercial Source | Date of symptom onset | Date of serum collection | Days between symptom onset and serum collection | Age | Sex       | Race             | Ethnicity                                                                     | Symptoms                                                                                                                                                                                                     | Previous qRT-PCR testing |
|-------------------------------------------------------------|---------------------|---------------------------------------------------------------------|----------------------------------------|----------------------------------------|---------------------------------------|---------------------------------|----------------------------------------------------------------|----------------------------------------------------|-----------|---------------|--------------------------------------------------------------|------|---------------|-------------------|-----------------------|--------------------------|-------------------------------------------------|-----|-----------|------------------|-------------------------------------------------------------------------------|--------------------------------------------------------------------------------------------------------------------------------------------------------------------------------------------------------------|--------------------------|
|                                                             |                     |                                                                     |                                        |                                        |                                       |                                 |                                                                | RBD                                                | NP        | RBD/NP Fusion | RBD                                                          | NP   | RBD/NP Fusion |                   |                       |                          |                                                 |     |           |                  |                                                                               |                                                                                                                                                                                                              |                          |
| Abbott false negative                                       | 118                 | Positive                                                            | Negative                               | 0.4                                    | Positive                              | 61.8                            | Positive                                                       | Positive                                           | Positive  | Positive      | 7.5                                                          | 10.3 | 6.6           | iSpecimen         | 3/22/2020             | 5/8/2020                 | 47                                              | 70  | M         | Caucasian        | Non Hispanic/Latino                                                           | Difficulty breathing / shortness of breath, Wheezing, Dry cough, Fever or chills, Sore throat, Aches and pains, Headache                                                                                     | n/a                      |
|                                                             | 258                 | Positive                                                            | Negative                               | 1.4                                    | Positive                              | 26.8                            | Positive                                                       | Positive                                           | Positive  | Positive      | 11.1                                                         | 15.5 | 6.1           | iSpecimen         | 5/13/2020             | 6/3/2020                 | 21                                              | 31  | F         | Caucasian        | Non Hispanic/Latino                                                           | Loss of smell or taste, Fever or chills, Aches and pains, Headache                                                                                                                                           | Positive                 |
|                                                             | 287                 | Positive                                                            | Negative                               | 0.6                                    | Positive                              | 34.5                            | Positive                                                       | Positive                                           | Positive  | Positive      | 4.5                                                          | 5.5  | 1.5           | iSpecimen         | 6/15/2020             | 7/2/2020                 | 17                                              | 23  | M         | Caucasian        | Hispanic                                                                      | Difficulty breathing / shortness of breath, Dry cough, Loss of smell or taste, Fever or chills, Aches and pains, Loss of appetite                                                                            | Positive                 |
|                                                             | 315                 | Positive                                                            | Negative                               | 0.9                                    | Positive                              | 9.2                             | Positive                                                       | Positive                                           | Positive  | Positive      | 6.9                                                          | 9.7  | 4.7           | iSpecimen         | 6/23/2020             | 7/12/2020                | 19                                              | 39  | F         | Caucasian        | Hispanic                                                                      | Dry cough, Loss of smell or taste, Fever or chills, Sore throat, Aches and pains                                                                                                                             | Positive                 |
|                                                             | 319                 | Positive                                                            | Negative                               | 0.5                                    | Positive                              | 108.0                           | Positive                                                       | Positive                                           | Positive  | Positive      | 5.2                                                          | 7.0  | 2.2           | iSpecimen         | 6/27/2020             | 7/12/2020                | 15                                              | 21  | M         | Caucasian        | Hispanic                                                                      | Nasal congestion, Loss of smell or taste, Fever or chills, Sore throat, Aches and pains                                                                                                                      | Positive                 |
| 323                                                         | Positive            | Negative                                                            | 0.6                                    | Positive                               | 114.0                                 | Positive                        | Positive                                                       | Positive                                           | Positive  | 5.3           | 6.5                                                          | 2.2  | iSpecimen     | 6/26/2020         | 7/13/2020             | 17                       | 64                                              | M   | Caucasian | Hispanic         | Loss of smell or taste, Fever or chills, Diarrhea, Headache, Loss of appetite | Positive                                                                                                                                                                                                     |                          |
| Ortho false negative                                        | 285                 | Positive                                                            | Positive                               | 3.0                                    | Negative                              | 0.8                             | Positive                                                       | Positive                                           | Positive  | Positive      | 4.8                                                          | 6.3  | 11.8          | iSpecimen         | 6/16/2020             | 7/2/2020                 | 16                                              | 74  | M         | Caucasian        | Hispanic                                                                      | Nasal congestion, Runny nose, Fatigue, Aches and pains, Nausea or vomiting, Confusion, Loss of appetite                                                                                                      | Positive                 |
|                                                             | 210                 | Positive                                                            | Positive                               | 4.7                                    | Positive                              | 6.8                             | Negative                                                       | Equivocal                                          | Positive  | Positive      | 1.0                                                          | 1.2  | 14.8          | n/a               | n/a                   | n/a                      | n/a                                             | n/a | n/a       | n/a              | Not Reported                                                                  | n/a                                                                                                                                                                                                          |                          |
| Tetracore false negative                                    | 292                 | Positive                                                            | Positive                               | 2.5                                    | Positive                              | 11.7                            | Negative                                                       | Equivocal                                          | Positive  | Positive      | 1.1                                                          | 1.4  | 1.7           | iSpecimen         | 6/11/2020             | 6/22/2020                | 21                                              | 39  | F         | Caucasian        | Hispanic                                                                      | Productive cough, loss of smell or taste, Fever or chills, Sore throat                                                                                                                                       | Positive                 |
|                                                             | 279*                | Positive                                                            | Negative                               | 0.6                                    | Negative                              | 0.4                             | Positive                                                       | Positive                                           | Positive  | Positive      | 4.8                                                          | 6.4  | 4.3           | iSpecimen         | 6/15/2020             | 7/1/2020                 | 16                                              | 66  | F         | Caucasian        | Hispanic                                                                      | Nasal congestion, Loss of smell or taste, Sweating, Fatigue, Aches and pains, Diarrhea                                                                                                                       | Positive                 |
| Tetracore and Abbott false negative                         | 270                 | Positive                                                            | Negative                               | 0.4                                    | Positive                              | 1.2                             | Negative                                                       | Negative                                           | Equivocal | Negative      | 0.8                                                          | 1.0  | 0.8           | iSpecimen         | 6/10/2020             | 6/24/2020                | 14                                              | 66  | F         | Caucasian        | Hispanic                                                                      | Difficulty breathing / shortness of breath, Productive cough, Dry cough, Loss of smell or taste, Fever or chills, Sweating, Chest pain or pressure, Fatigue, Diarrhea, Headache, Confusion, Loss of appetite | Positive                 |
|                                                             | 302                 | Positive                                                            | Negative                               | 0.3                                    | Positive                              | 5.7                             | Negative                                                       | Negative                                           | Negative  | Negative      | 0.2                                                          | 0.3  | 0.2           | iSpecimen         | 5/22/2020             | 6/6/2020                 | 15                                              | 28  | M         | Caucasian        | Hispanic                                                                      | Productive cough, Nasal congestion, Fever or chills, Fatigue, Aches and pains, Nausea or vomiting, Diarrhea, Headache                                                                                        | Positive                 |
|                                                             | 307                 | Positive                                                            | Negative                               | 0.8                                    | Positive                              | 3.0                             | Negative                                                       | Positive                                           | Positive  | Negative      | 1.4                                                          | 2.4  | 0.8           | iSpecimen         | 6/20/2020             | 7/11/2020                | 21                                              | 28  | F         | Caucasian        | Hispanic                                                                      | Fever or chills, Fatigue, Aches and pains, Headache                                                                                                                                                          | Positive                 |
|                                                             | 312                 | Positive                                                            | Negative                               | 0.3                                    | Positive                              | 27.9                            | Negative                                                       | Positive                                           | Positive  | Equivocal     | 2.1                                                          | 2.6  | 1.0           | iSpecimen         | 6/25/2020             | 7/12/2020                | 17                                              | 36  | M         | Caucasian        | Hispanic                                                                      | Loss of smell or taste, Sore throat, Fatigue, Headache                                                                                                                                                       | Positive                 |
|                                                             | 317                 | Positive                                                            | Negative                               | 0.3                                    | Positive                              | 4.4                             | Negative                                                       | Positive                                           | Positive  | Negative      | 1.5                                                          | 2.1  | 0.4           | iSpecimen         | 6/27/2020             | 7/12/2020                | 15                                              | 41  | F         | Caucasian        | Hispanic                                                                      | Loss of smell or taste, Sore throat, Chest pain or pressure, Aches and pains, Headache                                                                                                                       | Positive                 |
|                                                             | 321                 | Positive                                                            | Negative                               | 0.5                                    | Positive                              | 1.0                             | Negative                                                       | Negative                                           | Negative  | Equivocal     | 0.6                                                          | 0.7  | 1.0           | iSpecimen         | 6/27/2020             | 7/12/2020                | 15                                              | 21  | F         | Caucasian        | Hispanic                                                                      | Dry cough, Loss of smell or taste, Headache, Loss of appetite                                                                                                                                                | Positive                 |
|                                                             | 322                 | Positive                                                            | Negative                               | 0.2                                    | Positive                              | 4.2                             | Negative                                                       | Positive                                           | Positive  | Negative      | 2.5                                                          | 3.5  | 0.7           | iSpecimen         | 6/26/2020             | 7/13/2020                | 17                                              | 62  | F         | Caucasian        | Hispanic                                                                      | Dry cough, Loss of smell or taste, Aches and pains, Headache, Loss of appetite                                                                                                                               | Positive                 |
| Tetracore and Ortho false negative                          | 308                 | Positive                                                            | Positive                               | 2.3                                    | Negative                              | 0.7                             | Negative                                                       | Negative                                           | Negative  | Negative      | 0.4                                                          | 0.4  | 0.6           | iSpecimen         | 6/11/2020             | 7/11/2020                | 30                                              | 60  | F         | Caucasian        | Hispanic                                                                      | Difficulty breathing / shortness of breath, Runny nose, Loss of smell or taste, Sore throat, Chest pain or pressure, Aches and pains, Headache, Loss of appetite                                             | Positive                 |
|                                                             | 166                 | Negative                                                            | Positive                               | 1.7                                    | Negative                              | 0.0                             | Negative                                                       | Negative                                           | Negative  | Negative      | 0.2                                                          | 0.1  | 0.1           | Bio/VT            | n/a                   | 9/10/2019                | n/a                                             | 43  | M         | Caucasian        | n/a                                                                           | Not Tested for COVID-19                                                                                                                                                                                      | n/a                      |
| Tetracore RBD and NP false positive (overall call negative) | 126                 | Negative                                                            | Negative                               | 0.0                                    | Negative                              | 0.0                             | Negative                                                       | Equivocal                                          | Positive  | Negative      | 1.1                                                          | 2.7  | 0.1           | iSpecimen         | 5/7/2020              | 5/21/2020                | 14                                              | 56  | F         | Caucasian        | Non Hispanic/Latino                                                           | n/a                                                                                                                                                                                                          | Negative                 |
|                                                             | 38*                 | Negative                                                            | Negative                               | 0.3                                    | Negative                              | 0.0                             | Negative                                                       | Positive                                           | Positive  | Negative      | 3.6                                                          | 2.2  | 0.2           | Bio/VT            | n/a                   | 9/17/2019                | n/a                                             | 46  | M         | African American | n/a                                                                           | Not Tested for COVID-19                                                                                                                                                                                      | n/a                      |
|                                                             | 80*                 | Negative                                                            | Negative                               | 0.1                                    | Negative                              | 0.0                             | Negative                                                       | Positive                                           | Positive  | Negative      | 2.0                                                          | 3.0  | 0.5           | Bio/VT            | n/a                   | 9/16/2019                | n/a                                             | 23  | M         | African American | n/a                                                                           | Not Tested for COVID-19                                                                                                                                                                                      | n/a                      |
|                                                             | 161*                | Negative                                                            | Negative                               | 0.1                                    | Negative                              | 0.0                             | Negative                                                       | Positive                                           | Positive  | Negative      | 3.4                                                          | 2.9  | 0.2           | Bio/VT            | n/a                   | 9/12/2019                | n/a                                             | 26  | M         | African American | n/a                                                                           | Not Tested for COVID-19                                                                                                                                                                                      | n/a                      |
|                                                             | 169*                | Negative                                                            | Negative                               | 0.1                                    | Negative                              | 0.0                             | Negative                                                       | Positive                                           | Positive  | Equivocal     | 4.3                                                          | 5.2  | 1.1           | Bio/VT            | n/a                   | 9/23/2019                | n/a                                             | 54  | M         | Caucasian        | n/a                                                                           | Not Tested for COVID-19                                                                                                                                                                                      | n/a                      |
| 184*                                                        | Negative            | Negative                                                            | 0.1                                    | Negative                               | 0.0                                   | Negative                        | Positive                                                       | Positive                                           | Negative  | 1.4           | 3.1                                                          | 0.1  | Bio/VT        | n/a               | 9/10/2019             | n/a                      | 26                                              | M   | Caucasian | n/a              | Not Tested for COVID-19                                                       | n/a                                                                                                                                                                                                          |                          |

\* indicates that specimen had discrepant results for both assay comparisons (Tetracore vs. Abbott and Tetracore vs. Ortho)

9

10

11

12

13

14

15 **Supplemental Figures**

16

17 **Figure S1.** Distribution of time between COVID-19 symptom onset and date of serum  
18 collection.

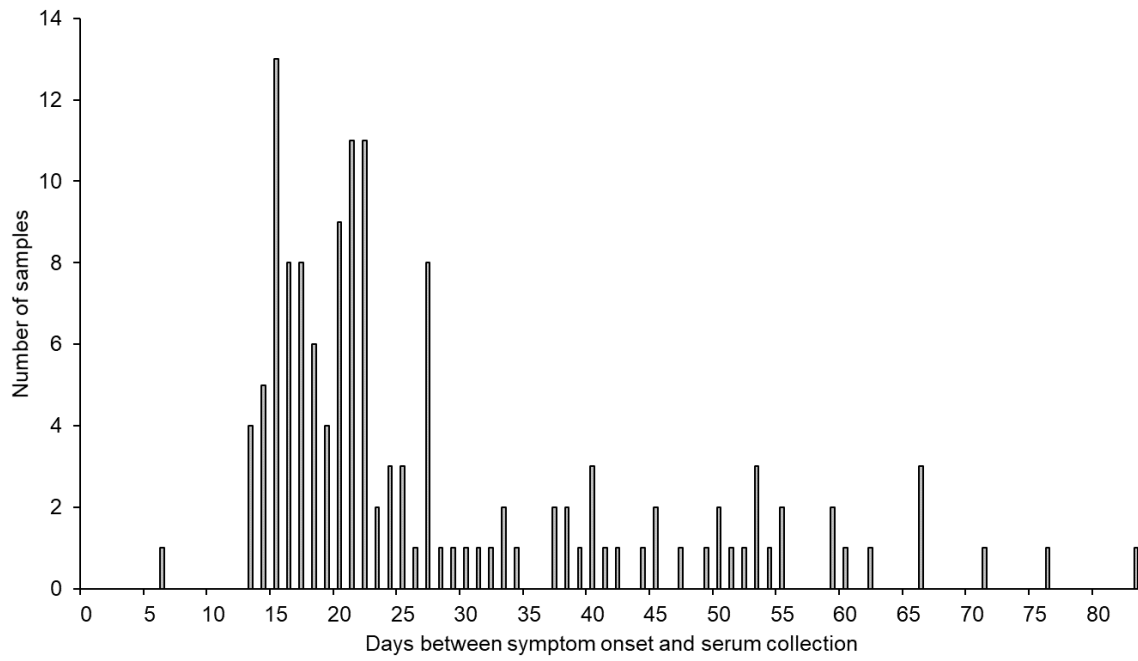

19

20

21

22

23

24

25

26

27

28

29

30 **Figure S2.** Time to seropositivity by individual targets in multiplex assay.

31

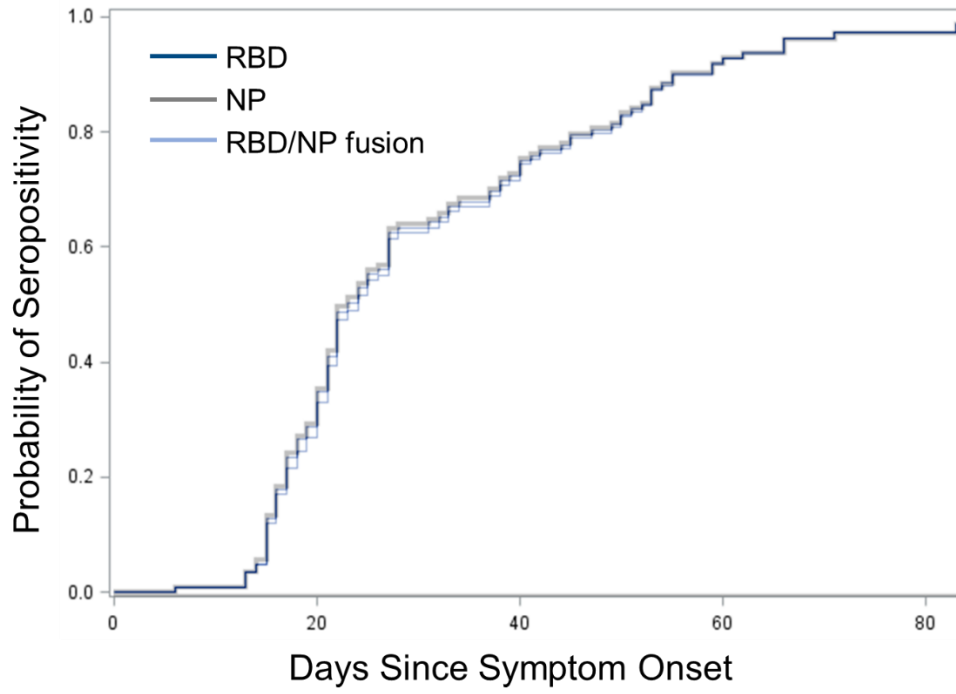

32

33
